# Supplementary material for: FHL3 Contributes to EMT and Chemotherapy Resistance Through Up-Regulation of Slug and Activation of TGFβ/Smad-Independent Pathways in Gastric Cancer
Source: PubMed Central journal article supplement (PMC8213027; doi:10.3389/fonc.2021.649029), 2021-06-04

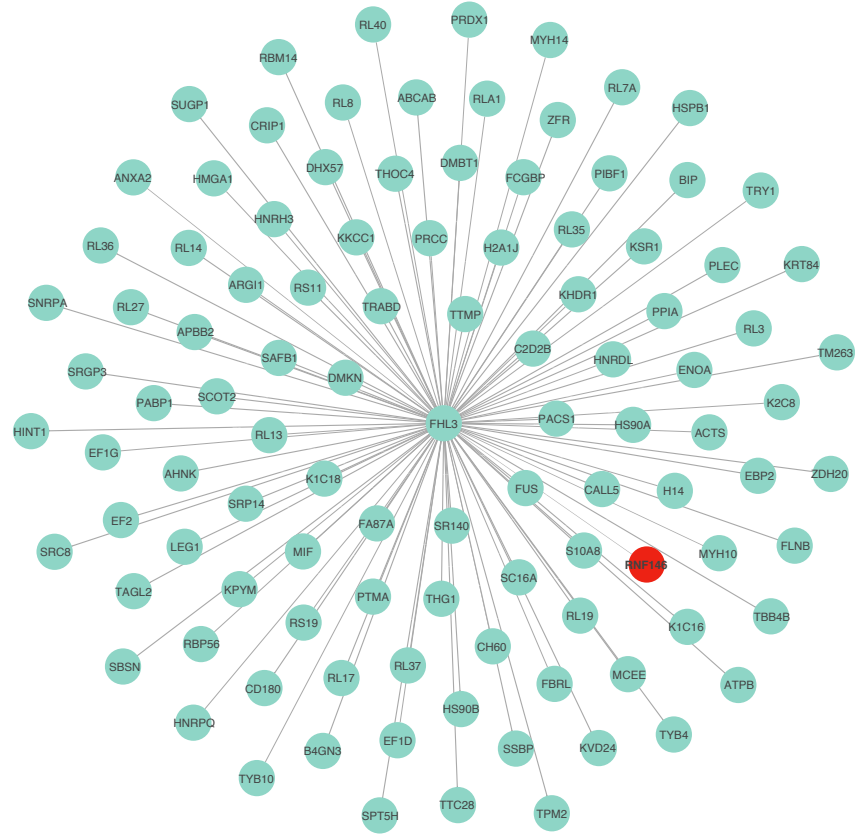

Supplement: Image_1.pdf [file Image_1.pdf]
